# Supplementary material for: Comparison between Enteroscopy-, Laparoscopy- and Endoscopic Ultrasound-Assisted Endoscopic Retrograde Cholangio-Pancreatography in Patients with Surgically Altered Anatomy: A Systematic Review and Meta-Analysis
Source: Life (Basel). 2022 Oct 20;12(10):1646. doi: 10.3390/life12101646 (PMC9605390; doi:10.3390/life12101646)
Supplement: Supplementary file 1 [file life-12-01646-s001.zip › life-1932318-supplementary.pdf]

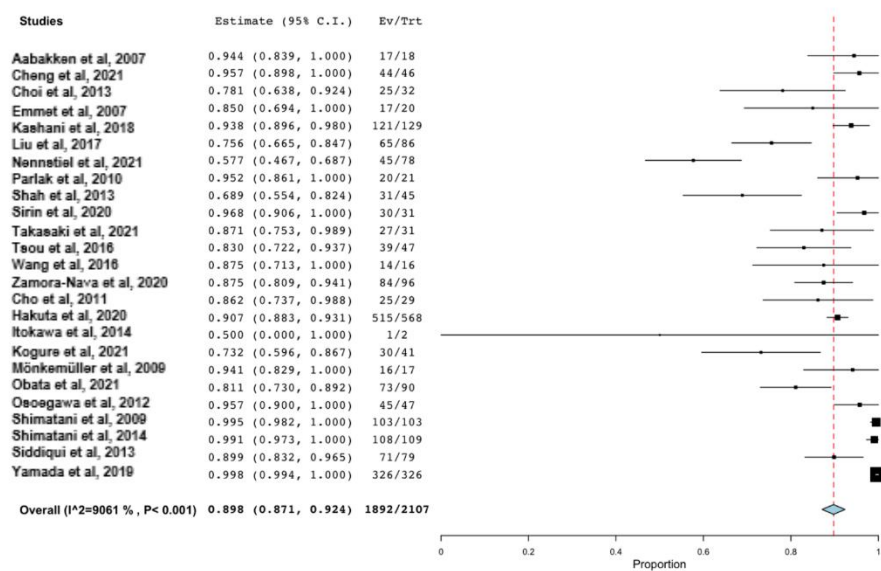

a

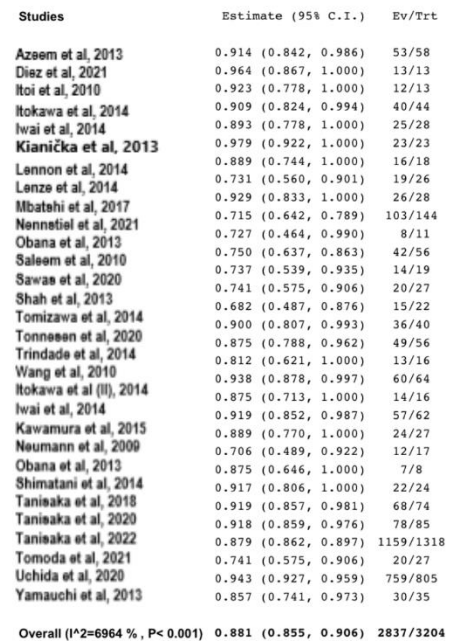

b

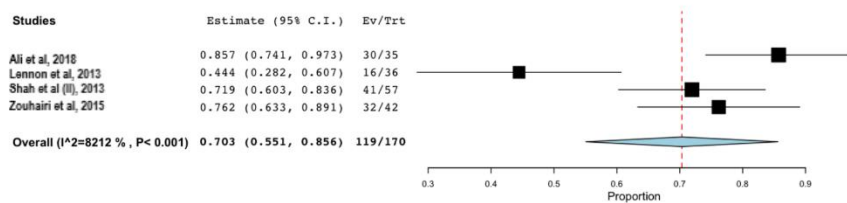

c

**Figure S1.** Forest plots reporting pooled results of the meta-analysis concerning technical success of (a) DBE, (b) SBE, and (c) manual SE-ERCP.

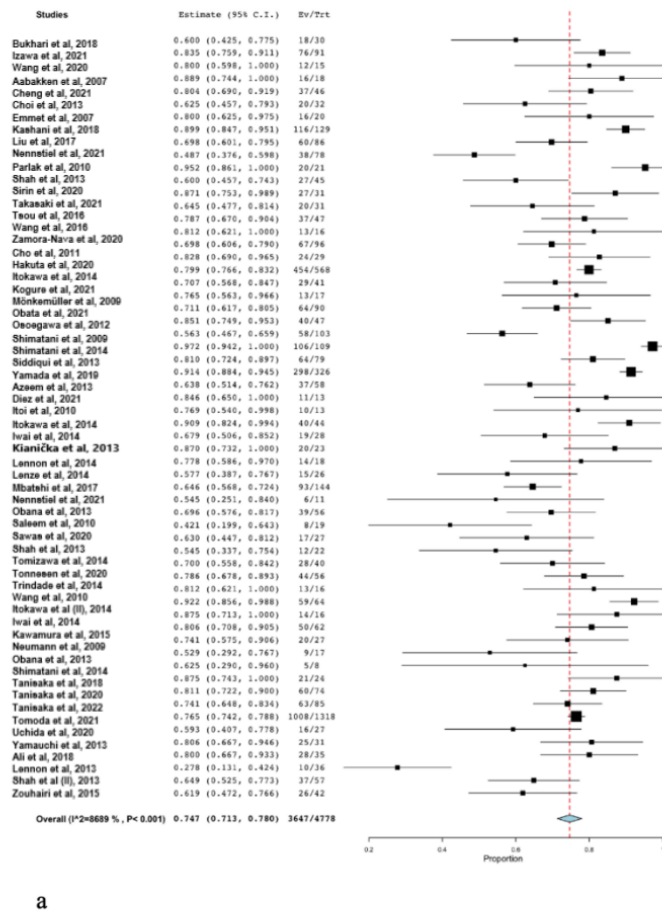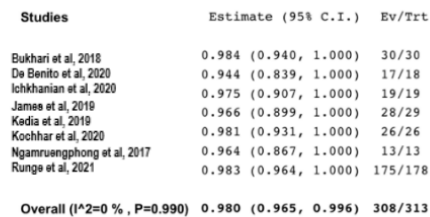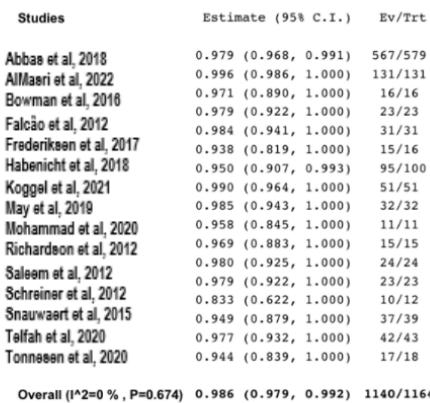

**Figure S2.** Forest plots reporting pooled results of the meta-analysis concerning cannulation success of (a) EA-ERCP, (b) EDGE, and (c) LA-ERCP

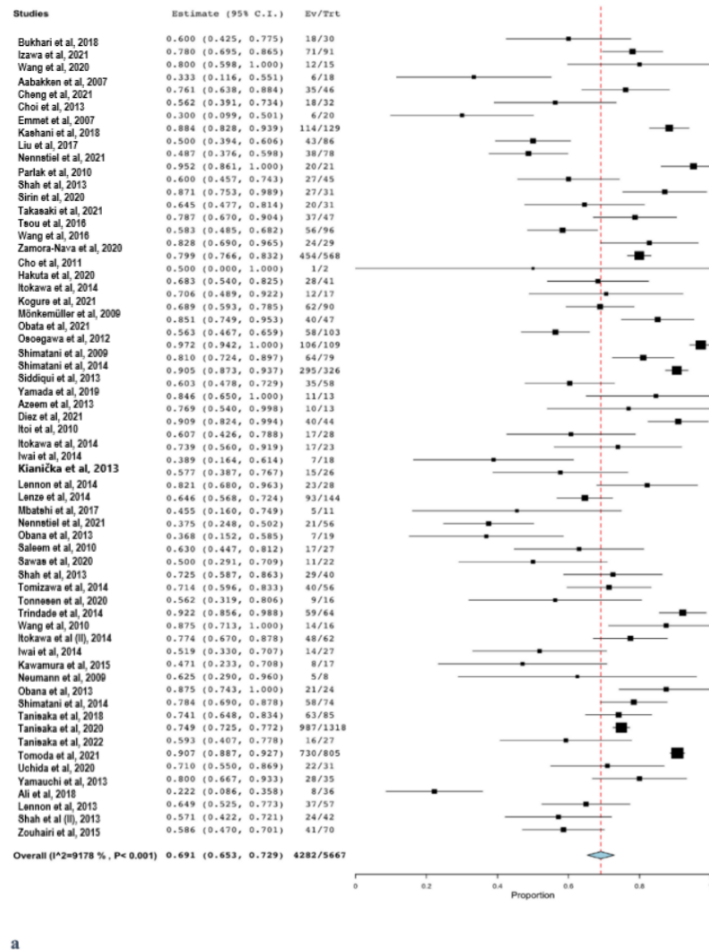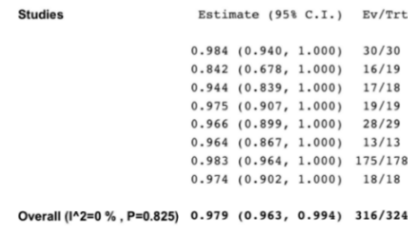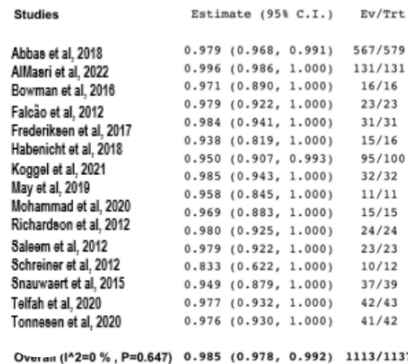

**Figure S3.** Forest plots reporting pooled results of the meta-analysis concerning therapeutic success of (a) EA-ERCP, (b) EDGE, and (c) LA-ERCP.

Supplementary Table S1. Main characteristics of included studies

| No                        | Author/year             | Study design                 | Study period | Patients, n | Endoscopic modality, n (%) | Age [mean ± SD, median (range)] | Sex, female; n(%)   | Indication, n (%)      |           |                 |                    |          |                          |              |             | Type of Surgery, n (%) |                        |                    |                       |                    |                    | Previous failure, n (%) | Intact papilla, n (%) |                        |
|---------------------------|-------------------------|------------------------------|--------------|-------------|----------------------------|---------------------------------|---------------------|------------------------|-----------|-----------------|--------------------|----------|--------------------------|--------------|-------------|------------------------|------------------------|--------------------|-----------------------|--------------------|--------------------|-------------------------|-----------------------|------------------------|
|                           |                         |                              |              |             |                            |                                 |                     | lithiasis              | SOD       | benign stenosis | malignant stenosis | leak     | abnormal LFTs/dilatation | pancreatitis | cholangitis | other                  | RY                     | RYGB               | BII                   | Whipple            | RY-h/jstomy        |                         |                       | other                  |
| Enteroscope assisted-ERCP |                         |                              |              |             |                            |                                 |                     |                        |           |                 |                    |          |                          |              |             |                        |                        |                    |                       |                    |                    |                         |                       |                        |
| 1                         | Aabakken et al, 2007    | case series                  | 2005-2006    | 13          | DBE                        | 53(2-81)                        | 4 (30.8)            | n/a                    |           |                 |                    |          |                          |              |             | 13 (100)               | 0                      | 0                  | 0                     | 0                  | 0                  | 2 (15.4)                | 2 (15.4)              |                        |
| 2                         | Cheng et al, 2021       | retrospective                | 2015-2020    | 37          | DBE                        | 70.8 (29-100)                   | 16 (43.2)           | 15 (40.5)              | 0 (0.0)   | 0 (0.0)         | 0 (0.0)            | 0 (0.0)  | 15 (40.5)                | 2 (5.4)      | 5 (13.5)    | 0 (0.0)                | 10 (27.0)              | 0 (0.0)            | 15 (40.5)             | 7 (18.9)           | 5 (13.5)           | 0 (0.0)                 | n/a                   | n/a                    |
| 3                         | Cho et al, 2011         | retrospective                | 2007-2008    | 20          | short DBE                  | 58 (26-85)                      | 10 (50.0)           | 10 (50.0)              | 0 (0.0)   | 8 (40.0)        | 0 (0.0)            | 1 (5.0)  | 0 (0.0)                  | 0 (0.0)      | 8 (40.0)    | 2 (10.0)               | 5 (25.0)               | 0 (0.0)            | 6 (30.0)              | 1 (5.0)            | 7 (35.0)           | 1 (5.0)                 | 12 (60.0)             | n/a                    |
| 4                         | Diez et al, 2021        | case series                  | 2018-2020    | 11          | SBE                        | 81 (60-91)                      | 2 (18.2)            | 11 (100)               | 0 (0.0)   | 0 (0.0)         | 0 (0.0)            | 0 (0.0)  | 0 (0.0)                  | 0 (0.0)      | 0 (0.0)     | 0 (0.0)                | 11 (100)               | 0 (0.0)            | 0 (0.0)               | 0 (0.0)            | 0 (0.0)            | 0 (0.0)                 | n/a                   | 10 (90.9)              |
| 5                         | Emmett et al, 2007      | case series                  | 2005-2007    | 14          | DBE                        | 47 (27-73)                      | 7 (50.0)            | 0 (0.0)                | 0 (0.0)   | 0 (0.0)         | 0 (0.0)            | 0 (0.0)  | 4 (28.6)                 | 3 (21.4)     | 2 (14.3)    | 11 (78.6)              | 0 (0.0)                | 14 (100)           | 0 (0.0)               | 0 (0.0)            | 0 (0.0)            | 0 (0.0)                 | n/a                   | 6 (42.9)               |
| 6                         | Hakuta et al, 2020      | retrospective                | 2010-2019    | 568         | short DBE                  | n/a                             | 208 (36.6)          | 135 (23.8)             | 0 (0.0)   | 159 (28.0)      | 89 (15.7)          | 0 (0.0)  | 0 (0.0)                  | 0 (0.0)      | 44 (7.7)    | 40 (7.0)               | 361 (63.6)             | 0 (0.0)            | 132 (23.2)            | 0 (0.0)            | 0 (0.0)            | 75 (13.2)               | n/a                   | n/a                    |
| 7                         | Itoi et al, 2010        | retrospective                | 2007-2008    | 13          | SBE                        | 67.5 (36-86)                    | 3 (23.1)            | 11 (84.6)              | 0 (0.0)   | 0 (0.0)         | 0 (0.0)            | 0 (0.0)  | 1 (7.7)                  | 0 (0.0)      | 1 (7.7)     | 0 (0.0)                | 9 (69.2)               | 0 (0.0)            | 2 (15.4)              | 0 (0.0)            | 2 (15.4)           | 0 (0.0)                 | n/a                   | 2 (15.4)               |
| 8                         | Itokawa et al, 2014     | not stated                   | 2005-2013    | 62          | BA-ERCP                    | 12-81                           | 29 (46.8)           | 25 (40.3)              | 0 (0.0)   | 0 (0.0)         | 0 (0.0)            | 0 (0.0)  | 0 (0.0)                  | 0 (0.0)      | 19 (30.6)   | 36 (58.1)              | 0 (0.0)                | 0 (0.0)            | 0 (0.0)               | 28 (45.2)          | 34 (54.8)          | 0 (0.0)                 | 2 (3.2)               | n/a                    |
| 9                         | Iwai et al, 2014        | retrospective                | 2007-2013    | 90          | SBE<br>short SBE           | n/a                             | n/a                 | 28 (31.1)<br>62 (68.9) | 0 (0.0)   | 0 (0.0)         | 0 (0.0)            | 0 (0.0)  | 0 (0.0)                  | 0 (0.0)      | 0 (0.0)     | 0 (0.0)                | 19 (21.1)<br>52 (57.8) | 0 (0.0)<br>0 (0.0) | 9 (10.0)<br>10 (11.1) | 0 (0.0)<br>0 (0.0) | 0 (0.0)<br>0 (0.0) | 0 (0.0)<br>0 (0.0)      | n/a                   | 22 (24.4)<br>41 (45.6) |
| 10                        | Izawa et al, 2021       | retrospective                | 2012-2019    | 91          | BA-ERCP                    | 72.6 (± 72.6)                   | 22 (24.2)           | 58 (63.7)              | 0 (0.0)   | 27 (29.7)       | 0 (0.0)            | 0 (0.0)  | 0 (0.0)                  | 0 (0.0)      | 0 (0.0)     | 7 (11.5)               | 58 (63.7)              | 0 (0.0)            | 8 (63.7)              | 18 (19.8)          | 0 (0.0)            | 7 (7.7)                 | n/a                   | n/a                    |
| 11                        | Kashani et al, 2018     | retrospective                | 2005-2012    | 103         | DBE                        | 50 (22-82)                      | 90 (87.4)           | 26 (25.2)              | 66 (64.1) | 8 (7.8)         | 0 (0.0)            | 8 (7.8)  | 5 (4.9)                  | 9 (8.7)      | 0 (0.0)     | 1 (0.9)                | 0 (0.0)                | 103 (100)          | 0 (0.0)               | 0 (0.0)            | 0 (0.0)            | 0 (0.0)                 | n/a                   | 92 (89.3)              |
| 12                        | Kawamura et al, 2015    | retrospective                | 2012-2013    | 18          | short SBE                  | 17 (47-86)                      | 4 (22.2)            | 6 (33.3)               | 0 (0.0)   | 3 (16.7)        | 17 (94.4)          | 0 (0.0)  | 0 (0.0)                  | 0 (0.0)      | 0 (0.0)     | 1 (5.6)                | 15 (83.3)              | 0 (0.0)            | 2 (11.1)              | 0 (0.0)            | 10 (6.1)           | 0 (0.0)                 | n/a                   | 7 (38.9)               |
| 13                        | Kianička et al, 2013    | retrospective                | 2009-2011    | 15          | SBE                        | 53.8 (26-67)                    | 8 (53.3)            | 5 (33.3)               | 0 (0.0)   | 5 (33.3)        | 0 (0.0)            | 0 (0.0)  | 1 (1.7)                  | 0 (0.0)      | 0 (0.0)     | 0 (0.0)                | 0 (0.0)                | 0 (0.0)            | 0 (0.0)               | 0 (0.0)            | 15 (100)           | 0 (0.0)                 | n/a                   | n/a                    |
| 14                        | Kogure et al, 2021      | retrospective                | 2006-2019    | 38          | short DBE                  | 66 (47-72)                      | 18 (47.4)           | ERP: 38 (100)          |           |                 |                    |          |                          |              |             | 13 (34.2)              |                        | 25 (65.8)          |                       |                    |                    | 3 (7.9)                 | n/a                   |                        |
| 15                        | Lenze et al, 2014       | prospective                  | 2008-2011    | 26          | SBE                        | 69.5 (20–86)                    | 10 (38.5)           | 10 (38.5)              | 0 (0.0)   | 9 (34.6)        | 7 (26.9)           | 0 (0.0)  | 0 (0.0)                  | 0 (0.0)      | 0 (0.0)     | 0 (0.0)                | 23 (88.5)              |                    |                       | 3 (11.5)           |                    | 26 (100)                | 14 (53.8)             |                        |
| 16                        | Liu et al, 2017         | retrospective                | 2009-2015    | 51          | DBE                        | 60.5 (18-89)                    | 12 (23.5)           | 0 (0.0)                | 0 (0.0)   | 0 (0.0)         | 0 (0.0)            | 3 (3.5)* | 63 (73.3)                | 1 (1.2)      | 14 (16.3)   | 19 (22.1)              | 51 (100)               | 0 (0.0)            | 0 (0.0)               | 0 (0.0)            | 0 (0.0)            | 0 (0.0)                 | n/a                   | 9 (17.6)               |
| 17                        | Mönkemüller et al, 2009 | prospective                  | n/a          | 11          | sDBE                       | 59.7 (36-77)                    | 1 (9.1)             | 1 (9.1)                | 0 (0.0)   | 1 (9.1)         | 2 (18.2)           | 0 (0.0)  | 4 (36.4)                 | 0 (0.0)      | 2 (18.2)    | 1 (9.1)                | 11 (100)               | 0 (0.0)            | 0 (0.0)               | 0 (0.0)            | 0 (0.0)            | 0 (0.0)                 | n/a                   | 2 (18.2)               |
| 18                        | Neumann et al, 2009     | prospective                  | 2007-2008    | 13          | short SBE                  | 66.5 (25-77)                    | 5 (38.5)            | 4 (30.8)               | 0 (0.0)   | 0 (0.0)         | 0 (0.0)            | 0 (0.0)  | 3 (23.1)                 | 0 (0.0)      | 6 (46.2)    | 0 (0.0)                | 13 (100)               | 0 (0.0)            | 0 (0.0)               | 0 (0.0)            | 0 (0.0)            | 0 (0.0)                 | n/a                   | 4 (30.8)               |
| 19                        | Obana et al, 2013       | n/a but probably prospective | 2008-2012    | 19          | SBE<br>short SBE           | 75.1 ± 8.4<br>78.5 ± 4.9        | 3 (15.8)<br>1 (5.3) | 15 (78.9)              | 0 (0.0)   | 0 (0.0)         | 4 (21.1)           | 0 (0.0)  | 0 (0.0)                  | 0 (0.0)      | 0 (0.0)     | 0 (0.0)                | 19 (100)               | 0 (0.0)            | 0 (0.0)               | 0 (0.0)            | 0 (0.0)            | 0 (0.0)                 | n/a                   | n/a                    |
| 20                        | Obata et al, 2021       | retrospective                | 2011-2020    | 79          | short DBE                  | 79 (73-84)                      | 17 (21.1)           | 79 (100)               | 0 (0.0)   | 0 (0.0)         | 0 (0.0)            | 0 (0.0)  | 0 (0.0)                  | 0 (0.0)      | 0 (0.0)     | 0 (0.0)                | 79 (100)               | 0 (0.0)            | 0 (0.0)               | 0 (0.0)            | 0 (0.0)            | 0 (0.0)                 | n/a                   | n/a                    |
| 21                        | Osoegawa et al, 2012    | prospective                  | 2006-2011    | 28          | short DBE                  | 74 (54-91)                      | 10 (35.7)           | n/a                    |           |                 |                    |          |                          |              |             | 13 (46.4)              | 0 (0.0)                | 15 (53.6)          | 0 (0.0)               | 0 (0.0)            | 0 (0.0)            | 0 (0.0)                 | n/a                   | 26 (92.9)              |
| 22                        | Parlak et al, 2010      | retrospective                | n/a          | 14          | DBE                        | 45.3 (28-61)                    | 7 (50.0)            | 0 (0.0)                | 0 (0.0)   | 1 (7.1)         | 0 (0.0)            | 0 (0.0)  | 3 (21.4)                 | 0 (0.0)      | 9 (64.3)    | 1 (7.1)                | 14 (100)               | 0 (0.0)            | 0 (0.0)               | 0 (0.0)            | 0 (0.0)            | 0 (0.0)                 | n/a                   | n/a                    |
| 23                        | Saleem et al, 2010      | retrospective                | 2008-2010    | 50          | SBE                        | 57 (19–85)                      | 16 (32.0)           | n/a                    |           |                 |                    |          |                          |              |             | 41 (73.2)*             | 15 (26.8)*             | 0 (0.0)            | 0 (0.0)               | 0 (0.0)            | 0 (0.0)            | 0 (0.0)                 | 0 (0.0)               | 0 (0.0)                |
| 24                        | Shimatani et al, 2009   | retrospective                | 2006-2008    | 68          | short DBE                  | n/a                             | n/a                 | n/a                    |           |                 |                    |          |                          |              |             | 36 (52.9)              | 0 (0.0)                | 17 (25.0)          | 15 (22.1)             | 0 (0.0)            | 0 (0.0)            | 0 (0.0)                 | n/a                   | 55 (80.9)              |
| 25                        | Shimatani et al, 2014   | retrospective                | 2016         | 24          | short SBE                  | n/a                             | n/a                 | n/a                    |           |                 |                    |          |                          |              |             | 12 (50.0)              | 0 (0.0)                | 3 (12.5)           | 9 (37.5)              | 0 (0.0)            | 0 (0.0)            | 0 (0.0)                 | n/a                   | 7 (29.2)               |

|                             |                            |               |           |      |                |                |             |                                                                  |            |            |           |           |            |          |            |            |            |            |           |            |            |            |            |           |            |
|-----------------------------|----------------------------|---------------|-----------|------|----------------|----------------|-------------|------------------------------------------------------------------|------------|------------|-----------|-----------|------------|----------|------------|------------|------------|------------|-----------|------------|------------|------------|------------|-----------|------------|
| 26                          | Siddiqui et al, 2013       | retrospective | 2008-2011 | 79   | short DBE      | 58 (29-86)     | 49 (62.0)   | 48 (60.8)                                                        | 3 (3.8)    | 20 (25.3)  | 0 (0.0)   | 3 (3.8)   | 0 (0.0)    | 0 (0.0)  | 0 (0.0)    | 5 (6.3)    | 12 (15.2)  | 39 (49.4)  | 3 (3.8)   | 20 (25.3)  | 5 (6.3)    | 0 (0.0)    | 8 (10.1)   | 42 (53.2) |            |
| 27                          | Takasaki et al, 2021       | retrospective | 2010-2020 | 31   | DBE            | 67.4 ± 16.8    | 7 (22.6)    | 31 (100)                                                         | 0 (0.0)    | 0 (0.0)    | 0 (0.0)   | 0 (0.0)   | 0 (0.0)    | 0 (0.0)  | 0 (0.0)    | 0 (0.0)    | 16 (51.6)  | 0 (0.0)    | 1 (3.2)   | 5 (16.1)   | 9 (29.0)   | 0 (0.0)    | n/a        | n/a       |            |
| 28                          | Tanisaka et al, 2018       | retrospective | 2011-2017 | 61   | short SBE      | 71 (64.5–76.5) | 15 (24.6)   | 41 (67.2)                                                        | 0 (0.0)    | 0 (0.0)    | 20 (32.8) | 0 (0.0)   | 0 (0.0)    | 0 (0.0)  | 0 (0.0)    | 0 (0.0)    | 61 (100)   | 0 (0.0)    | 0 (0.0)   | 0 (0.0)    | 0 (0.0)    | 0 (0.0)    | n/a        | 58 (95.1) |            |
| 29                          | Tanisaka et al, 2020       | retrospective | 2011-2018 | 85   | short SBE      | 71.5 (36-88)*  | 17 (21.8)** | 53 (67.9)**                                                      | 0 (0.0)    | 0 (0.0)    | 25 (32.1) | 0 (0.0)   | n/a        | 0 (0.0)  | 0 (0.0)    | 85 (100)   | 0 (0.0)    | 0 (0.0)    | 0 (0.0)   | 0 (0.0)    | 0 (0.0)    | 0 (0.0)    | n/a        | 85 (100)  |            |
| 30                          | Tanisaka et al, 2022       | retrospective | 2011-2019 | 1318 | short SBE      | 73 (66-79)     | 398 (30.2)  | Benign indication: 1069 (81.1), Malignant indication: 249 (18.9) |            |            |           |           |            |          |            |            |            | 527 (40.0) | 0 (0.0)   | 200 (15.2) | 356 (27.0) | 221 (16.8) | 14 (1.0)   | n/a       | 674 (51.1) |
| 31                          | Tomizawa et al, 2014       | retrospective | 2009-2011 | 14   | SBE            | 63 (35-83)     | 9 (64.3)    | 0 (0.0)                                                          | 0 (0.0)    | 0 (0.0)    | 0 (0.0)   | 0 (0.0)   | 10 (71.4)  | 0 (0.0)  | 7 (50.0)   | 5 (35.7)   | 14 (100)   | 0 (0.0)    | 0 (0.0)   | 0 (0.0)    | 0 (0.0)    | 0 (0.0)    | 0 (0.0)    | 2 (14.3)  |            |
| 32                          | Tomoda et al, 2021         | retrospective | 2011-2019 | 45   | short DBE      | 67 (59-75)     | 16 (35.6)   | 0 (0.0)                                                          | 0 (0.0)    | 0 (0.0)    | 27 (60.0) | 0 (0.0)   | 0 (0.0)    | 0 (0.0)  | 0 (0.0)    | 0 (0.0)    | 22 (48.9)  | 0 (0.0)    | 5 (11.1)  | 18 (40.0)  | 0 (0.0)    | 0 (0.0)    | n/a        | 18 (40.0) |            |
| 33                          | Trindade et al, 2014       | retrospective | 2011-2013 | 56   | SBE (+cap)     | 56 (28-80)     | 45 (80.4)   | 29 (51.8)                                                        | 0 (0.0)    | 4 (7.1)    | 0 (0.0)   | 4 (7.1)   | 9 (16.1)   | 0 (0.0)  | 10 (17.9)  | 0 (0.0)    | n/a        | n/a        | n/a       | n/a        | n/a        | n/a        | n/a        | 44 (78.6) |            |
| 34                          | Tsou et al, 2016           | retrospective | 2007-2013 | 47   | DBE            | 54.4 (26–87)   | 25 (53.2)   | 35 (74.5)                                                        | 0 (0.0)    | 6 (12.8)   | 6 (12.8)  | 0 (0.0)   | 0 (0.0)    | 0 (0.0)  | 0 (0.0)    | 0 (0.0)    | 14 (29.8)  | 0 (0.0)    | 0 (0.0)   | 0 (0.0)    | 33 (70.2)  | 0 (0.0)    | n/a        | 13 (27.7) |            |
| 35                          | Uchida et al, 2020         | retrospective | 2011-2018 | 319  | short DBE      | 69 (median)    | 124 (38.9)  | 58 (18.2)                                                        | 0 (0.0)    | 221 (69.3) | 0 (0.0)   | 0 (0.0)   | 0 (0.0)    | 0 (0.0)  | 0 (0.0)    | 30 (9.4)   | 135 (42.3) | 0 (0.0)    | 22 (6.9)  | 162 (50.8) | 0 (0.0)    | 0 (0.0)    | n/a        | 41 (12.9) |            |
| 36                          | Wang et al, 2010           | retrospective | 2007-2009 | 13   | SBE            | 54 (28-82)     | 11 (84.6)   | 1 (7.7)                                                          | 0 (0.0)    | 2 (15.4)   |           | 0 (0.0)   | 7 (53.8)   | 2 (15.4) | 4 (30.8)   | 0 (0.0)    | 3 (18.8)*  | 8 (50.0)*  | 1 (6.2)*  | 3 (18.8)*  | 1 (6.2)*   | 0 (0.0)    | n/a        | n/a       |            |
| 37                          | Wang et al, 2020           | retrospective | 2016-2019 | 15   | BA-ERCP        | 51.5 (28-63)   | 4 (26.7)    | 0 (0.0)                                                          | 0 (0.0)    | 13 (86.7)  | 1 (6.7)   | 0 (0.0)   | 0 (0.0)    | 0 (0.0)  | 0 (0.0)    | 0 (0.0)    | 1 (6.7)    | 0 (0.0)    | 0 (0.0)   | 4 (26.7)   | 9 (60.0)   | 0 (0.0)    | n/a        | n/a       |            |
| 38                          | Wu et al, 2019             | retrospective | 2010-2016 | 46   | SBE            | 72.1 ± 11.2    | 19 (41.3)   | 32 (69.6)                                                        | 0 (0.0)    | 20 (43.5)  | 6 (13.0)  | 0 (0.0)   | 0 (0.0)    | 0 (0.0)  | 0 (0.0)    | 10 (21.7)  | 46 (100)   | 0 (0.0)    | 0 (0.0)   | 0 (0.0)    | 0 (0.0)    | 0 (0.0)    | n/a        | n/a       |            |
| 39                          | Yamada et al, 2019         | retrospective | 2005-2017 | 322  | short DBE      | 65.15 ± 15.6   | 142 (44.1)  | 149 (46.3)                                                       | 185 (57.5) | 0 (0.0)    | 0 (0.0)   | 0 (0.0)   | 0 (0.0)    | 0 (0.0)  | 0 (0.0)    | 11 (3.4)   | 82 (25.5)  | 0 (0.0)    | 82 (25.5) | 0 (0.0)    | 158 (49.1) | 0 (0.0)    | n/a        | n/a       |            |
| 40                          | Yamauchi et al, 2013       | retrospective | 2011-2012 | 28   | short SBE      | 72.0 (50-85)   | 2 (7.1)     | 19 (67.9)                                                        | 0 (0.0)    | 0 (0.0)    | 9 (32.1)  | 0 (0.0)   | 0 (0.0)    | 1 (3.6)  | 2 (7.1)    | 1 (3.6)    | 14 (50.0)  | 22 (78.6)  | 0 (0.0)   | 0 (0.0)    | 2 (7.1)    | 0 (0.0)    | n/a        | 19 (67.9) |            |
| 41                          | Zamora-Nava et al, 2020    | prospective   | 2010-2016 | 75   | DBE (mixed)    | 40.8 (± 10.2)  | 69 (71.9)*  | 0 (0.0)                                                          | 0 (0.0)    | 0 (0.0)    | 0 (0.0)   | 0 (0.0)   | 0 (0.0)    | 0 (0.0)  | 47 (48.9)* | 49 (51.0)* | 81 (84.3)* | 2 (2.1)*   | 3 (3.1)*  | 10 (10.4)* | 0 (0.0)    | 0 (0.0)    | 26 (37.7)* | n/a       |            |
| 42                          | Ali et al, 2018            | retrospective | 2009-1016 | 31   | Manual SE-ERCP | 55 (22-75)     | 25 (80.6)   | 14 (45.2)                                                        | 5 (16.1)   | 2 (6.5)    | 6 (19.4)  | 1 (3.2)   | 0 (0.0)    | 2 (6.5)  | 0 (0.0)    | 5 (16.1)   | 31 (100)   | 0 (0.0)    | 0 (0.0)   | 0 (0.0)    | 0 (0.0)    | 0 (0.0)    | n/a        | 24 (77.4) |            |
| 43                          | Zouhairi et al, 2015       | retrospective | 2009-2012 | 36   | Manual SE-ERCP | 49.3 (29-75)   | 34 (94.4)   | 13 (36.1)                                                        | 4 (11.1)   | 20 (55.6)  | 0 (0.0)   | 2 (5.6)   | 1 (2.8)    | 0 (0.0)  | 0 (0.0)    | 0 (0.0)    | 33 (91.7)  | 0 (0.0)    | 2 (5.6)   | 0 (0.0)    | 1 (2.8)    | 0 (0.0)    | n/a        | n/a       |            |
| <b>Studies with EDGE</b>    |                            |               |           |      |                |                |             |                                                                  |            |            |           |           |            |          |            |            |            |            |           |            |            |            |            |           |            |
| 44                          | De Benito et al, 2020      | retrospective | 2016-2019 | 14   | EDGE           | 56 (± 9.7)     | 12 (85.7)   | 6 (42.9)                                                         | 0 (0.0)    | 0 (0.0)    | 0 (0.0)   | 1 (7.1)   | 2 (14.2)   | 2 (14.2) | 3 (21.4)   | 0 (0.0)    | 0 (0.0)    | 14 (100)   | 0 (0.0)   | 0 (0.0)    | 0 (0.0)    | 0 (0.0)    | n/a        | n/a       |            |
| 45                          | Ichkhanian et al, 2020     | retrospective | 2014-2018 | 18   | EDEE           | 63.1 (43-83)   | 13 (72.2)   | 5 (27.8)                                                         | 0 (0.0)    | 4 (22.2)   | 8 (44.4)  | 0 (0.0)   | 0 (0.0)    | 0 (0.0)  | 0 (0.0)    | 1 (5.6)    | 6 (33.3)   | 0 (0.0)    | 0 (0.0)   | 10 (55.6)  | 0 (0.0)    | 2 (11.1)   | 16 (88.9)  | n/a       |            |
| 46                          | James et al, 2019          | retrospective | 2016-2018 | 19   | EDGE           | 55.5 (± 3.2)   | 15 (78.9)   | 8 (42.1)                                                         | 0 (0.0)    | 4 (21.1)   | 0 (0.0)   | 0 (0.0)   | 1 (5.3)    | 6 (31.6) | 0 (0.0)    | 0 (0.0)    | 0 (0.0)    | 15 (100)   | 0 (0.0)   | 0 (0.0)    | 0 (0.0)    | 0 (0.0)    | 3 (15.8)   | n/a       |            |
| 47                          | Ngamruengphong et al, 2017 | retrospective | 2014-2016 | 13   | EDGE           | 55 ± 16        | 11 (84.6)   | 5 (38.5)                                                         | 0 (0.0)    | 2 (15.4)   | 0 (0.0)   | 2 (15.4)  | 0 (0.0)    | 0 (0.0)  | 0 (0.0)    | 0 (0.0)    | 0 (0.0)    | 13 (100)   | 0 (0.0)   | 0 (0.0)    | 0 (0.0)    | 0 (0.0)    | n/a        | n/a       |            |
| 48                          | Runge et al, 2021          | retrospective | 2014-2019 | 178  | EDGE           | 58± 11         | 140 (78.7)  | 97 (54.5)                                                        | 12 (6.7)   | 16 (8.9)   | 8 (4.5)   | 18 (10.1) | 8 (4.5)    | 13 (7.3) | 0 (0.0)    | 6 (3.4)    | 0 (0.0)    | 178 (100)  | 0 (0.0)   | 0 (0.0)    | 0 (0.0)    | 0 (0.0)    | n/a        | n/a       |            |
| <b>Studies with LA-ERCP</b> |                            |               |           |      |                |                |             |                                                                  |            |            |           |           |            |          |            |            |            |            |           |            |            |            |            |           |            |
| 49                          | Abbas et al, 2018          | retrospective | 2005-2016 | 579  | LA-ERCP        | 51 (43-61)     | 91 (15.7)   | 254 (43.9)                                                       | 0 (0.0)    | 122 (21.1) | 7 (1.2)   | 7 (1.2)   | 126 (21.8) | 56 (9.7) | 0 (0.0)    | 23         | 0 (0.0)    | 579 (100)  | 0 (0.0)   | 0 (0.0)    | 0 (0.0)    | 0 (0.0)    | 151 (26.1) | n/a       |            |
| 50                          | AlMasri et al, 2022        | retrospective | 2007-2019 | 131  | LA-ERCP        | 60 (50-67)     | 106 (80.9)  | 102 (77.9)                                                       | 23 (17.6)  | 0 (0.0)    | 3 (2.3)   | 3 (2.3)   | 0 (0.0)    | 0 (0.0)  | 0 (0.0)    | 0 (0.0)    | 131 (100)  |            |           |            |            |            |            |           | n/a        |
| 51                          | Bowman et al, 2016         | retrospective | n/a       | 15   | LA-ERCP        | 48.8 (25-69)   | 11 (73.3)   | 1 (6.7)                                                          | 0 (0.0)    | 4 (26.7)   | 0 (0.0)   | 0 (0.0)   | 0 (0.0)    | 5 (33.3) | 0 (0.0)    | 5 (33.3)   | 0 (0.0)    | 15 (100)   | 0 (0.0)   | 0 (0.0)    | 0 (0.0)    | 0 (0.0)    | 4 (26.7)   | 14 (93.3) |            |
| 52                          | Falcão et al, 2012         | prospective   | 2003-2010 | 23   | LA-ERCP        | 35.3 (27-52)   | 19 (82.6)   | 14 (60.9)                                                        | 0 (0.0)    | 0 (0.0)    | 0 (0.0)   | 0 (0.0)   | 3 (13.0)   | 0 (0.0)  | 0 (0.0)    | 6 (26.1)   | 0 (0.0)    | 23 (100)   | 0 (0.0)   | 0 (0.0)    | 0 (0.0)    | 0 (0.0)    | n/a        | 23 (100)  |            |
| 53                          | Frederiksen et al, 2017    | retrospective | 2010-2016 | 29   | LA-ERCP        | 46 (25-65)     | 25 (86.2)   | 29 (100)                                                         | 0 (0.0)    | 0 (0.0)    | 0 (0.0)   | 0 (0.0)   | 0 (0.0)    | 0 (0.0)  | 0 (0.0)    | 0 (0.0)    | 0 (0.0)    | 29 (100)   | 0 (0.0)   | 0 (0.0)    | 0 (0.0)    | 0 (0.0)    | n/a        | n/a       |            |
| 54                          | Habenicht et al, 2018      | retrospective | 2012-2016 | 16   | LA-ERCP        | 55.8 (29-67)   | n/a         | n/a                                                              | n/a        | n/a        | n/a       | n/a       | n/a        | n/a      | n/a        | n/a        | 0 (0.0)    | 16 (100)   | 0 (0.0)   | 0 (0.0)    | 0 (0.0)    | 0 (0.0)    | 3 (18.8)   | n/a       |            |
| 55                          | Koggel et al, 2021         | retrospective | 2009-2019 | 86   | LA-ERCP        | 53.5 (27–72)   | 70 (81.4)   | 61 (70.9)                                                        | 2 (2.3)    | 0 (0.0)    | 0 (0.0)   | 7 (8.1)   | 0 (0.0)    | 0 (0.0)  | 25 (29.1)  | 5 (5.8)    | 0 (0.0)    | 86 (100)   | 0 (0.0)   | 0 (0.0)    | 0 (0.0)    | 0 (0.0)    | n/a        | n/a       |            |
| 56                          | May et al, 2019            | retrospective | 2009-2016 | 51   | LA-ERCP        | 55.4 (10.9)    | 45 (88.2)   | 24 (47.1)                                                        | 22 (43.1)  | 3 (5.9)    | 0 (0.0)   | 1 (1.9)   | 0 (0.0)    | 0 (0.0)  | 0 (0.0)    | 1 (1.9)    | 0 (0.0)    | 51 (100)   | 0 (0.0)   | 0 (0.0)    | 0 (0.0)    | 0 (0.0)    | n/a        | n/a       |            |
| 57                          | Mohammad et al, 2020       | retrospective | 2008-2016 | 32   | LA-ERCP        | 54 (26-74)     | 26 (81.3)   | 16 (50.0)                                                        | 0 (0.0)    | 0 (0.0)    | 0 (0.0)   | 1 (3.1)   | 11 (34.3)  | 2 (6.3)  | 2 (6.3)    | 0 (0.0)    | 0 (0.0)    | 32 (100)   | 0 (0.0)   | 0 (0.0)    | 0 (0.0)    | 0 (0.0)    | n/a        | n/a       |            |

|                                          |                        |                                                       |           |     |                                                                                                |                            |                        |                                                                                    |           |           |           |           |           |          |           |           |           |            |           |            |            |         |           |           |          |
|------------------------------------------|------------------------|-------------------------------------------------------|-----------|-----|------------------------------------------------------------------------------------------------|----------------------------|------------------------|------------------------------------------------------------------------------------|-----------|-----------|-----------|-----------|-----------|----------|-----------|-----------|-----------|------------|-----------|------------|------------|---------|-----------|-----------|----------|
| 58                                       | Richardson et al, 2012 | retrospective                                         | 2006-2011 | 11  | LA-ERCP                                                                                        | 54.3 (32-69)               | 9 (81.8)               | 4 (36.4)                                                                           | 1 (9.1)   | 0 (0.0)   | 0 (0.0)   | 0 (0.0)   | 3 (27.3)  | 3 (27.3) | 0 (0.0)   | 0 (0.0)   | 0 (0.0)   | 11 (100)   | 0 (0.0)   | 0 (0.0)    | 0 (0.0)    | 0 (0.0) | 0 (0.0)   | 4 (36.4)  | n/a      |
| 59                                       | Saleem et al, 2012     | retrospective                                         | 2005-2020 | 15  | LA-ERCP                                                                                        | 50.9 (25-70)               | 12 (80.0)              | 3 (20.0)                                                                           | 9 (60.0)  | 1 (6.7)   | 0 (0.0)   | 1 (6.7)   | 0 (0.0)   | 1 (6.7)  | 0 (0.0)   | 0 (0.0)   | 0 (0.0)   | 15 (100)   | 0 (0.0)   | 0 (0.0)    | 0 (0.0)    | 0 (0.0) | 0 (0.0)   | n/a       | 15 (100) |
| 60                                       | Schreiner et al, 2012  | retrospective                                         | 2007-2011 | 24  | LA-ERCP                                                                                        | 52                         | 19 (79.2)              | 3 (12.5)                                                                           | 0 (0.0)   | 20 (83.3) | 1 (4.2)   | 0 (0.0)   | 0 (0.0)   | 0 (0.0)  | 0 (0.0)   | 0 (0.0)   | 0 (0.0)   | 24 (100)   | 0 (0.0)   | 0 (0.0)    | 0 (0.0)    | 0 (0.0) | 0 (0.0)   | n/a       | n/a      |
| 61                                       | Snauwaert et al, 2015  | retrospective                                         | 2008-2014 | 23  | LA-ERCP                                                                                        | 54 (26-79)                 | 18 (78.3)              | 5 (21.7)                                                                           | 0 (0.0)   | 0 (0.0)   | 0 (0.0)   | 0 (0.0)   | 3 (13.0)  | 4 (17.4) | 3 (13.0)  | 4 (17.4)  | 0 (0.0)   | 23 (100)   | 0 (0.0)   | 0 (0.0)    | 0 (0.0)    | 0 (0.0) | 0 (0.0)   | n/a       | 23 (100) |
| 62                                       | Telfah et al, 2020     | retrospective                                         | 2010-2019 | 12  | LA-ERCP                                                                                        | 64 (34-73)                 | 9 (75.0)               | 0 (0.0)                                                                            | 0 (0.0)   | 0 (0.0)   | 0 (0.0)   | 0 (0.0)   | 8 (66.7)  | 0 (0.0)  | 4 (33.3)  | 0 (0.0)   | 0 (0.0)   | 12 (100)   | 0 (0.0)   | 0 (0.0)    | 0 (0.0)    | 0 (0.0) | 0 (0.0)   | n/a       | n/a      |
| Studies comparing two or more techniques |                        |                                                       |           |     |                                                                                                |                            |                        |                                                                                    |           |           |           |           |           |          |           |           |           |            |           |            |            |         |           |           |          |
| 63                                       | Azeem et al, 2013      | retrospective cohort (cross-over on modality failure) | 2002-2012 | 36  | colonoscope                                                                                    | 49 (2-68)                  | 28 (34.1)              | 0 (0.0)                                                                            | 0 (0.0)   | 64 (45.4) | 0 (0.0)   | 3 (2.1)   | 48 (34.0) | 0 (0.0)  | 18 (12.8) | 8 (5.7)   | 99 (100)  | 0 (0.0)    | 0 (0.0)   | 0 (0.0)    | 0 (0.0)    | 0 (0.0) | n/a       | n/a       |          |
|                                          |                        |                                                       |           |     | SBE                                                                                            | 54.4 (18-68)               | 11 (30.6)              | 0 (0.0)                                                                            | 0 (0.0)   | 23 (39.7) | 0 (0.0)   | 1 (1.7)   | 22 (37.9) | 0 (0.0)  | 10 (17.2) | 2 (3.4)   |           |            |           |            |            |         |           |           |          |
| 64                                       | Mbatshi et al, 2017    | retrospective                                         | 2006-2015 | 38  | classic ERCP SBE                                                                               | 73.7 (48-91)               | 17 (44.7)              | 20 (52.6)                                                                          | 0 (0.0)   | 0 (0.0)   | 1 (2.6)   | 0 (0.0)   | 0 (0.0)   | 8 (21.1) | 8 (21.1)  | 2 (5.3)   | 0 (0.0)   | 0 (0.0)    | 38 (100)  | 0 (0.0)    | 0 (0.0)    | 0 (0.0) | 0 (0.0)   | 8 (21.1)  | n/a      |
| 65                                       | Nennstiel et al, 2021  | retrospective                                         | 2006-2014 | 411 | pediatric colonoscope simple duodenoscope pediatric colonoscope SBE DBE colonoscope gastroscop | 64 (± 15)                  | 159 (38.7)             | Malignant obstruction 203 (49.4) , Benign obstruction 187 (45.5), Unclear 15 (3.6) |           |           |           |           |           |          |           |           |           | 186 (45.3) | 0 (0.0)   | 105 (25.5) | 120 (29.2) | 0 (0.0) | 0 (0.0)   | n/a       | n/a      |
| 66                                       | Wang et al, 2016       | retrospective                                         | 2013-2016 | 97  | gastroscop colonoscope simple duodenoscope DBE                                                 | 28-84                      | 38 (39.2)              | 60 (61.9)                                                                          | 0 (0.0)   | 8 (8.2)   | 29 (29.9) | 0 (0.0)   | 0 (0.0)   | 0 (0.0)  | 0 (0.0)   | 0 (0.0)   | 20 (20.6) | 0 (0.0)    | 52 (53.6) | 25 (25.8)  |            | 0 (0.0) | n/a       | 72 (74.2) |          |
| 67                                       | Sirin et al, 2020      | retrospective                                         | 2008-2014 | 62  | simple duodenoscope DBE                                                                        | 61 (31-78)                 | 21 (33.9)              | 23 (37.1)                                                                          | 0 (0.0)   | 6 (9.7)   | 9 (14.5)  | 0 (0.0)   | 9 (14.5)  | 0 (0.0)  | 0 (0.0)   | 0 (0.0)   | 11 (17.7) | 0 (0.0)    | 51 (82.3) | 0 (0.0)    | 0 (0.0)    | 0 (0.0) | 31 (50.0) | n/a       |          |
| 68                                       | Bukhari et al, 2018    | retrospective                                         | 2014-2016 | 60  | EDGE BA-ERCP                                                                                   | 52.5±13.4<br>61.8±11.5     | 27 (45.0)<br>18 (30.0) | 43 (71.7)                                                                          | 3 (5.0)   | 7 (11.7)  | 0 (0.0)   | 3 (5.0)   | 0 (0.0)   | 4 (6.7)  | 0 (0.0)   | 0 (0.0)   | 0 (0.0)   | 60 (100)   | 0 (0.0)   | 0 (0.0)    | 0 (0.0)    | 0 (0.0) | 0 (0.0)   | n/a       | n/a      |
| 69                                       | Tonnesen et al, 2020   | retrospective                                         | 2013-2017 | 68  | LA-ERCP SBE                                                                                    | 48.8 (35-77)<br>51 (37-72) | 27 (39.7)<br>26 (38.2) | 48 (70.6)                                                                          | 0 (0.0)   | 4 (5.9)   | 0 (0.0)   | 7 (10.3)  | 0 (0.0)   | 0 (0.0)  | 0 (0.0)   | 20 (29.4) | 0 (0.0)   | 68 (100)   | 0 (0.0)   | 0 (0.0)    | 0 (0.0)    | 0 (0.0) | 0 (0.0)   | n/a       | n/a      |
| 70                                       | Wang et al, 2021       | retrospective                                         | 2016-2019 | 130 | BA-ERCP LA-ERCP                                                                                | 55.3 (14.3)<br>50.6 (15.9) | 47 (36.2)<br>38 (29.2) | 59 (45.4)                                                                          | 6 (4.6)   | 22 (16.9) | 11 (8.5)  | 13 (10.0) | 0 (0.0)   | 5 (3.8)  | 14 (10.8) | 0 (0.0)   | 0 (0.0)   | 130 (100)  | 0 (0.0)   | 0 (0.0)    | 0 (0.0)    | 0 (0.0) | 0 (0.0)   | n/a       | n/a      |
| 71                                       | Choi et al, 2013       | retrospective comparative trial                       | 2005-2011 | 72  | EDGE ERCP-gastrostomy DBE                                                                      | 44.8 ± 11.7<br>56.1 ± 12.2 | 42 (58.3)<br>26 (36.1) | 18 (25.0)                                                                          | 40 (55.6) | 0 (0.0)   | 4 (5.6)   | 2 (2.8)   | 0 (0.0)   | 8 (11.1) | 0 (0.0)   | 0 (0.0)   | 0 (0.0)   | 72 (100)   | 0 (0.0)   | 0 (0.0)    | 0 (0.0)    | 0 (0.0) | 0 (0.0)   | n/a       | n/a      |
| 72                                       | Sawas et al, 2020      | retrospective                                         | 2015-2017 | 30  | SBE RGA                                                                                        | 62.2 (10.2)                | 14 (46.7)<br>11 (36.7) | 16 (53.3)                                                                          | 0 (0.0)   | 1 (3.3)   | 1 (3.3)   | 1 (3.3)   | 9 (30.0)  | 3 (10.0) | 0 (0.0)   | 0 (0.0)   | 0 (0.0)   | 30 (100)   | 0 (0.0)   | 0 (0.0)    | 0 (0.0)    | 0 (0.0) | 0 (0.0)   | 3 (10.0)  | 30 (100) |
| 73                                       | Lennon et al, 2012     | retrospective                                         | 2007-2011 | 54  | SBE                                                                                            | n/a                        | 26 (48.1)              | n/a                                                                                |           |           |           |           |           |          |           |           |           | 10 (18.5)  | 8 (14.8)  | 0 (0.0)    | 0 (0.0)    | 0 (0.0) | 0 (0.0)   | 12 (22.2) | 9 (16.7) |

| SE-ERCP |                     |                           |           |     |         |             |              |                       |         |         |         |            |              |          |           |         | 15<br>(27.8) | 21<br>(38.9) | 0 (0.0) | 0 (0.0)   | 0 (0.0)   | 0 (0.0) |           |              |  |
|---------|---------------------|---------------------------|-----------|-----|---------|-------------|--------------|-----------------------|---------|---------|---------|------------|--------------|----------|-----------|---------|--------------|--------------|---------|-----------|-----------|---------|-----------|--------------|--|
| 74      | Shah et al, 2013    | retrospective             | 2008-2009 | 129 | SBE     |             |              |                       |         |         |         | 0<br>(0.0) | 94<br>(72.9) | 8 (6.2)  | 20 (15.5) | 7 (5.4) | 6 (4.7)      | 63<br>(48.8) | 0 (0.0) | 31 (24.0) | 24 (18.6) | 5 (3.9) | 37 (28.7) | 73<br>(56.6) |  |
|         |                     |                           |           |     |         |             |              |                       |         |         |         |            |              |          |           |         |              |              |         |           |           |         |           |              |  |
| 75      | Kedia et al, 2019   | retrospective             | 2005-2017 | 72  | LA-ERCP | 55 (33-82)  | 36<br>(50.0) | Biliary: 49 (68.1)    |         |         |         |            |              |          |           |         | 0 (0.0)      | 72 (100)     | 0 (0.0) | 0 (0.0)   | 0 (0.0)   | 0 (0.0) | 9 (12.5)  | 72 (100)     |  |
|         |                     |                           |           |     | EDGE    | 56 (35-82)  | 25<br>(34.7) | Pancreatic: 13 (18.1) |         |         |         |            |              |          |           |         |              |              |         |           |           |         |           |              |  |
| 76      | Kochhar et al, 2020 | retrospective-comparative | 2015-2019 | 56  | EDGE    | 60.77±11.44 | 20<br>(35.7) |                       |         |         |         |            |              |          |           |         |              |              |         |           |           |         |           |              |  |
|         |                     |                           |           |     | LA-ERCP | 60.78±12.67 | 12<br>(21.4) | 26<br>(51.8)          | 0 (0.0) | 5 (8.9) | 0 (0.0) | 5<br>(8.9) | 7 (12.5)     | 6 (10.7) | 4 (7.1)   | 4 (7.1) | 0 (0.0)      | 56 (100)     | 0 (0.0) | 0 (0.0)   | 0 (0.0)   | 0 (0.0) | 4 (7.1)   | n/a          |  |
|         |                     |                           |           |     | E-ERCP  | 68.58±15.09 | 8 (14.3)     |                       |         |         |         |            |              |          |           |         |              |              |         |           |           |         |           |              |  |

\* calculated compared to total procedures

\*\*calculated based on cases with technical success

BII, Billroth II; BA-ERCP, balloon assisted-ERCP; DBE, double-balloon enteroscope assisted ERCP; EA-ERCP, enteroscope assisted ERCP; EDEE, entero-enteral anastomosis to perform ERCP; EDGE, EUS-directed transgastric ERCP; ERCP, endoscopic retrograde cholangio-pancreatography; h/jstomy, hepaticojejunostomy; LA-ERCP, laparoscopy assisted- ERCP; LFTs, liver function tests; RGA, Rendezvous guidewire assisted; RY, Roux-n-Y; RYGB, Roux-n-Y gastric by-pass; SD, standard deviation; SBE, single-balloon enteroscope assisted ERCP; SE-ERCP, spiral enteroscope assisted ERCP; SOD, sphincter of Oddi disfunction

Supplementary Table S3. The results of quality assessment based on the National Heart, Lung, and Blood Institute tool for case-series

Studies

Quality assessment

| Author, year            | Was the study question or objective clearly stated? | Was the study population clearly and fully described, including a case definition? | Were the cases consecutive? | Were the subjects comparable? | Was the intervention clearly described? | Were the outcome measures                                                                     | Was the length of follow-up adequate? | Were the statistical methods well-described? | Were the results well-described? |
|-------------------------|-----------------------------------------------------|------------------------------------------------------------------------------------|-----------------------------|-------------------------------|-----------------------------------------|-----------------------------------------------------------------------------------------------|---------------------------------------|----------------------------------------------|----------------------------------|
|                         |                                                     |                                                                                    |                             |                               |                                         | clearly defined, valid, reliable, and implemented consistently across all study participants? |                                       |                                              |                                  |
| Aabakken et al, 2007    | No                                                  | Yes                                                                                | Yes                         | Yes                           | Yes                                     | Yes                                                                                           | Yes                                   | No                                           | Yes                              |
| Cheng et al, 2021       | Yes                                                 | Yes                                                                                | Yes                         | Yes                           | Yes                                     | Yes                                                                                           | Yes                                   | Yes                                          | Yes                              |
| Cho et al, 2011         | No                                                  | Yes                                                                                | Yes                         | Yes                           | Yes                                     | Yes                                                                                           | Yes                                   | No                                           | Yes                              |
| Diez et al, 2021        | Yes                                                 | Yes                                                                                | Yes                         | Yes                           | Yes                                     | Yes                                                                                           | Yes                                   | No                                           | Yes                              |
| Emmet et al, 2007       | Yes                                                 | Yes                                                                                | Yes                         | Yes                           | Yes                                     | Yes                                                                                           | Yes                                   | No                                           | Yes                              |
| Hakuta et al, 2020      | Yes                                                 | Yes                                                                                | Yes                         | Yes                           | Yes                                     | Yes                                                                                           | Yes                                   | Yes                                          | Yes                              |
| Itoi et al, 2010        | No                                                  | Yes                                                                                | Yes                         | Yes                           | Yes                                     | Yes                                                                                           | Yes                                   | No                                           | Yes                              |
| Itokawa et al, 2014     | Yes                                                 | Yes                                                                                | Yes                         | Yes                           | Yes                                     | Yes                                                                                           | Yes                                   | Yes                                          | Yes                              |
| Iwai et al, 2014        | Yes                                                 | Yes                                                                                | Yes                         | Yes                           | Yes                                     | Yes                                                                                           | Yes                                   | Yes                                          | Yes                              |
| Izawa et al, 2021       | Yes                                                 | Yes                                                                                | Yes                         | Yes                           | Yes                                     | Yes                                                                                           | Yes                                   | Yes                                          | Yes                              |
| Kashani et al, 2018     | Yes                                                 | Yes                                                                                | Yes                         | Yes                           | Yes                                     | Yes                                                                                           | Yes                                   | Yes                                          | Yes                              |
| Kawamura et al, 2015    | No                                                  | Yes                                                                                | Yes                         | Yes                           | Yes                                     | Yes                                                                                           | Yes                                   | No                                           | Yes                              |
| Kianička et al, 2013    | No                                                  | Yes                                                                                | Yes                         | Yes                           | Yes                                     | Yes                                                                                           | Yes                                   | No                                           | Yes                              |
| Kogure et al, 2021      | Yes                                                 | Yes                                                                                | Yes                         | Yes                           | Yes                                     | Yes                                                                                           | Yes                                   | Yes                                          | Yes                              |
| Lenze et al, 2014       | Yes                                                 | Yes                                                                                | Yes                         | Yes                           | Yes                                     | Yes                                                                                           | Yes                                   | Yes                                          | Yes                              |
| Liu et al, 2017         | No                                                  | Yes                                                                                | Yes                         | Yes                           | Yes                                     | Yes                                                                                           | Yes                                   | Yes                                          | Yes                              |
| Mönkemüller et al, 2009 | Yes                                                 | Yes                                                                                | Yes                         | Yes                           | Yes                                     | Yes                                                                                           | Yes                                   | Yes                                          | Yes                              |
| Neumann et al, 2009     | Yes                                                 | Yes                                                                                | Yes                         | Yes                           | Yes                                     | Yes                                                                                           | Yes                                   | No                                           | Yes                              |
| Obana et al, 2013       | Yes                                                 | Yes                                                                                | Yes                         | Yes                           | Yes                                     | Yes                                                                                           | Yes                                   | Yes                                          | Yes                              |
| Obata et al, 2021       | Yes                                                 | Yes                                                                                | Yes                         | Yes                           | Yes                                     | Yes                                                                                           | Yes                                   | Yes                                          | Yes                              |
| Osoegawa et al, 2012    | No                                                  | Yes                                                                                | Yes                         | Yes                           | Yes                                     | Yes                                                                                           | Yes                                   | Yes                                          | Yes                              |
| Parlak et al, 2010      | No                                                  | Yes                                                                                | Yes                         | Yes                           | Yes                                     | Yes                                                                                           | Yes                                   | No                                           | Yes                              |

[illegible]

|                     |     |     |     |     |     |     |     |     |     |
|---------------------|-----|-----|-----|-----|-----|-----|-----|-----|-----|
| Sawas et al, 2020   | Yes |
| Lennon et al, 2012  | No  | Yes |
| Shah et al, 2013    | Yes |
| Kedia et al, 2019   | Yes | No  |
| Kochhar et al, 2020 | Yes | No  |

**Supplementary Table S4. Pooled outcomes and comparisons between enteroscope-assisted modalities**

|                                  |     |  |                   | Comparison | (Sig.)  |
|----------------------------------|-----|--|-------------------|------------|---------|
|                                  |     |  |                   | DBE        | SBE     |
| Technical success rate (95%CI)   |     |  |                   |            |         |
| DBE                              |     |  | 89.8 (87.1-92.4)  |            | 0.65    |
| SBE                              |     |  | 88.1 (85.5-90.6)  |            |         |
| manual                           | SE- |  |                   |            |         |
| ERCP                             |     |  | 70.3 (55.1-85.6)  | <0.001*    | <0.001* |
| Cannulation success rate (95%CI) |     |  |                   |            |         |
| DBE                              |     |  | 77.5 (72.4-82.6)  |            | 0.72    |
| SBE                              |     |  | 74.7 (70.7-78.6)  |            |         |
| manual                           | SE- |  |                   |            |         |
| ERCP                             |     |  | 58.8 (37.9-79.7)  | <0.001*    | <0.001* |
| Therapeutic success rate (95%CI) |     |  |                   |            |         |
| DBE                              |     |  | 71.2 (64.9-77.6)  |            | 0.42    |
| SBE                              |     |  | 69.1 (63.8-74.5)  |            |         |
| manual                           | SE- |  |                   |            |         |
| ERCP                             |     |  | 56.1 (32.0-80.2)  | <0.001*    | <0.001* |
| Adverse Events rate (95%CI)      |     |  |                   |            |         |
| DBE                              |     |  | 5.7 (4.10-7.40)   |            | 0.68    |
| SBE                              |     |  | 5.2 (3.50-6.80)   |            |         |
| manual                           | SE- |  |                   |            |         |
| ERCP                             |     |  | 5.6 (-1.70-12.90) | 0.92       | 0.86    |

\**p*<0.05 indicates statistically significant difference  
*CI*, confidence interval; *DBE*, double-balloon enteroscope-assisted ERCP; *SE-ERCP*, spiral enteroscope-assisted ERCP; *SBE*, single-balloon enteroscope-assisted ERCP.
